# Supplementary material for: Inherited Variation in miR-290 Expression Suppresses Breast Cancer Progression by Targeting the Metastasis Susceptibility Gene Arid4b
Source: Oxford University Press journal article supplement (doi:10.1158/0008-5472.can-12-3513), 2013-02-28
Supplement: 00085472can123513-sup-tab1.pdf [file 00085472can123513-sup-tab1.pdf]

| Supplemental Table 1. Top Genes Dysregulated by miR-290 |             |                                                                             |          |       |
|---------------------------------------------------------|-------------|-----------------------------------------------------------------------------|----------|-------|
|                                                         | Gene Symbol | Gene                                                                        | p-value  | FC    |
| Down                                                    | Gpnmb       | Transmembrane glycoprotein NMB precursor                                    | 3.58E-03 | -6.22 |
|                                                         | Plekhh2     | Pleckstrin homology domain containing, family H                             | 5.89E-04 | -5.25 |
|                                                         | Car12       | Carbonic anhydrase 12                                                       | 8.63E-03 | -4.84 |
|                                                         | Gzme        | Granzyme E precursor                                                        | 6.95E-03 | -4.64 |
|                                                         | Mcpt1       | Mast cell protease 1 precursor                                              | 1.22E-02 | -4.57 |
|                                                         | Sdr39u1     | Short chain dehydrogenase/reductase family 39U, member 1                    | 1.38E-04 | -4.51 |
|                                                         | Baiap2l1    | Brain-specific angiogenesis inhibitor 1-associated protein 2-like protein 1 | 1.88E-03 | -4.24 |
|                                                         | Prr9        | Proline rich 9                                                              | 2.98E-03 | -3.97 |
|                                                         | Gzmd        | Granzyme D                                                                  | 4.02E-02 | -3.91 |
|                                                         | Slc25a43    | Solute carrier family 25, member 43                                         | 2.06E-05 | -3.69 |
| Up                                                      | Cyp2e1      | Cytochrome P450, family 2, subfamily e, polypeptide 1                       | 9.48E-05 | 74.86 |
|                                                         | Car3        | Carbonic anhydrase 3                                                        | 4.78E-03 | 34.30 |
|                                                         | Retn        | Adipose tissue-specific secretory factor                                    | 6.16E-05 | 33.89 |
|                                                         | Cfd         | Complement factor D                                                         | 1.58E-04 | 25.87 |
|                                                         | Adipoq      | Adiponectin, C1Q and collagen domain containing                             | 1.11E-03 | 24.23 |
|                                                         | Retnla      | Resistin like alpha                                                         | 5.49E-04 | 20.68 |
|                                                         | Hp          | Haptoglobin                                                                 | 5.63E-04 | 20.35 |
|                                                         | Cidec       | Cell death-inducing DFFA-like effector c                                    | 4.19E-04 | 20.27 |
|                                                         | Lgals12     | Lectin, galactose binding, soluble 12                                       | 8.09E-04 | 19.65 |
|                                                         | Ces1d       | Carboxylesterase 1D                                                         | 2.59E-03 | 19.57 |

The top differentially expressed genes based on fold change (FC) in the miR-290 tumors. Major urinary proteins 1, 2, 7, 11 and 19 displayed significant fold changes between the fold changes displayed by Cyp2e1 and Car3, but were not listed so more biologically relevant genes could be listed.
